# Supplementary material
Source: bioRxiv or medRxiv preprint supplement (https://www.medrxiv.org/highwire/filestream/84483/field_highwire_adjunct_files/5/2020.06.03.20118570-6.pdf)
Supplement: Supplementary file [file 2020.06.03.20118570-6.pdf]

**Supplementary Table 1. Characteristics of selected studies**, in terms of GEO accession, reference, platform used, number of genes analyzed and original number of patients.

| <b>GEO accession,<br/>Authors, Year [Ref.]</b>        | <b>Platform</b>                                                | <b>Number of genes<br/>analyzed</b> | <b>n</b> |
|-------------------------------------------------------|----------------------------------------------------------------|-------------------------------------|----------|
| GSE48452 / <a href="#">Ahrens M. et al. 2013</a>      | Affymetrix Human Gene 1.1 ST Array [transcript (gene) version] | 18,832                              | 73       |
| GSE61260 / <a href="#">Horvath S. et al. 2014</a>     | Affymetrix Human Gene 1.1 ST Array [transcript (gene) version] | 18,832                              | 134      |
| GSE66676 / <a href="#">Xanthakos S.A. et al. 2015</a> | Affymetrix Human Gene 1.0 ST Array [transcript (gene) version] | 18,832                              | 67       |
| GSE83452 / <a href="#">Lefebvre P. et al. 2017</a>    | Affymetrix Human Gene 2.0 ST Array [transcript (gene) version] | 15,681                              | 152      |
| GSE89632 / <a href="#">Arendt B.M. et al 2015</a>     | Illumina HumanHT-12 WG-DASL V4.0 R2 expression beadchip        | 20,310                              | 63       |
| GSE126848 / <a href="#">Suppli M.P. et al. 2019</a>   | Illumina NextSeq 500 (Homo sapiens)                            | 13,904                              | 57       |
| GSE130970 / <a href="#">Hoang S.A. et al. 2019</a>    | Illumina HiSeq 2500 (Homo sapiens)                             | 16,657                              | 78       |
